# Supplementary material for: Comparative Analysis of the Exo-Erythrocytic Development of Five Lineages of Haemoproteus majoris, a Common Haemosporidian Parasite of European Passeriform Birds
Source: Pathogens. 2023 Jun 30;12(7):898. doi: 10.3390/pathogens12070898 (PMC10386383; doi:10.3390/pathogens12070898)
Supplement: Supplementary file 1 [file pathogens-12-00898-s001.zip › Table S1-update.xlsx]

## Sheet: Sheet1
Table S1. Data on all individuals with Haemoproteus majoris infections investigated for exo-erythrocytic stages. Information is organised by lineage of infection and data is provided for the original identity number (also used in GenBank as isolate), the place and season of sampling, parasitemia, host species, parasite identification (through microscopy and PCR) and organs in which the exo-erythr…
Histology results for Haemoproteus majoris samples
Samples were collected in Ventes ragas in 2016, 2017, 2018, 2019, 2020, 2021 and 2022																						+	positive for H. majoris exo-erythrocytic stages
Samples were collected in Labanoras in 2018, 2019 and 2020							Abbreviations:															H	positive for other Haemoproteus exo-erythrocytic stages
							He	heart		Ki	kidney		Gi	gizzard		Sp	Spring					a	total parasitemia for all present parasites - no distinction between species
Probe	Sequence						Lu	lung		Br	brain		Trac	trachea		Su	Summer					b	only seen in microscopy
Haemo18S	5′- GCTAACCGTAGTTATAGTCGCCATCTC -3′						Li	liver		Mu	muscle		Oeso	oesophagus		Au	Autumn					c	not present in microscopy
							Sp	spleen		Int	intestine		Test	testicle								d	structure no longer present in next section; could not be tested for CISH
													Ovar	ovary								e	stages found in the pancreas
																						f	lineage obtained by cloning [28]
																						na	organ not collected/sections not present for analysis
							Tissue stages CISH													Tissue stages H&E													Accession numbers
Identity no.	Original Identity blood no.	Place of sampling	Season of sampling	Parasitemia (%)	Host species	Parasite species and MalAvi lineages	He	Lu	Li	Sp	Ki	Br	Mu	Int	Gi	Trac	Oeso	Test	Ovar	He	Lu	Li	Sp	Ki	Br	Mu	Int	Gi	Trac	Oeso	Test	Ovar	Slides in Vilnius	Number of Slides in Australia	GenBank
1 Sp	58/16R	Ventės Ragas	Spring	0.7	Fringilla coelebs	H. majoris (CCF5) Haemoproteus fringillae b L. sp. (BRAM3) c	+	H	-	na	-	-	-	na	na	na	na	na	na	+	H	-	-	-	-	-	na	na	na	na	na	na	49493 NS - 49501 NS	1
2 Sp	84/16R	Ventės Ragas	Spring	1.3	Fringilla coelebs	H. majoris (CCF5)	na	-	-	na	-	na	-	na	na	na	na	na	na	-	-	-	-	-	-	-	na	na	na	na	na	na
3 Sp	152/16R	Ventės Ragas	Spring	2,8, MIX a	Fringilla coelebs	H. majoris (CCF5) H. fringillae b Haemoproteus magnus b H. sp. b	-	+/H	-	na	-	-	-	na	na	na	na	na	na	-	+/H	-	-	-	-	-	na	na	na	na	na	na	49502 NS - 49504 NS	1
19 Sp	99/19R	Ventės Ragas	Spring	0.2	Fringilla coelebs	H. majoris (CCF5)	-	-	-	-	-	-	-	-	+	na	-	na	na	-	-	-	-	-	-	-	-	-	-	-	na	-	49505 NS
27 Sp	79/22R	Ventės Ragas	Spring	0,2 MIX a	Fringilla coelebs	H. majoris (CCF5) Mixed infection b	-	+	-	-	+	-	-	+	+	-	-	-	na	-	+	-	-	+	-	-	+	+	-	-	-	na	49506 NS - 49520 NS	4
28 Sp	93/22R	Ventės Ragas	Spring	0,1 MIX a	Fringilla coelebs	H. majoris (CCF5) L. sp. (EMCIR02) c Mixed infection b	-	-	-	-	-	-	-	+ e	+	na	-	-	na	-	-	-	-	-	-	-	+ e	+	na	-	-	na	49521 NS - 49528 NS	2
3 Su	9/20L	Labanoras	Summer	0.02	Parus cristatus	H. majoris (CCF5)	-	-	-	-	-	-	-	+ e	-	na	-	-	-	-	-	-	-	-	-	-	-	-	na	-	-	-	49529 NS
5 Sp	213/16R	Ventės Ragas	Spring	0,1 MIX a	Parus major	H. majoris (CWT4) Mixed infection b	na	-	-	na	-	-	na	na	na	na	na	na	na	-	-	-	-	-	-	-	na	na	na	na	na	na
6 Sp	267/16R	Ventės Ragas	Spring	1.3	Sylvia communis	H. majoris (CWT4)	-	-	na	-	na	-	-	na	na	na	na	na	na	-	-	-	-	-	-	+ d	na	na	na	na	na	na	49530 NS
8 Sp	286/17R	Ventės Ragas	Spring	1.1	Sylvia communis	H. majoris (CWT4)	-	-	-	-	-	-	-	na	na	na	na	na	na	-	-	-	-	-	-	-	na	na	na	na	na	na
10 Sp	10/18R	Ventės Ragas	Spring	0,5 MIX a	Sylvia nisoria	H. majoris (CWT4) Mixed infection b	-	-	-	-	-	-	-	na	na	na	na	na	na	-	-	-	-	-	-	-	na	na	na	na	na	na
13 Sp	125/18R	Ventės Ragas	Spring	0,3 MIX a	Sylvia nisoria	H. majoris (CWT4) Mixed infection b	-	-	-	-	-	-	-	na	na	na	na	na	na	-	-	-	-	-	-	-	na	na	na	na	na	na
22 Sp	417/19R	Ventės Ragas	Spring	1	Sylvia curruca	H. majoris (CWT4)	-	-	-	-	-	-	-	-	+	na	-	na	na	-	-	-	-	-	-	-	-	+	na	-	na	na	49531 NS - 49533 NS	1
18 Sp	20/19R	Ventės Ragas	Spring	1.6	Sylvia curruca	H. majoris (CWT4)	-	-	-	-	-	-	-	+	+	na	na	na	-	-	-	-	-	-	-	-	+	+	na	na	na	-	49534 NS - 49542 NS	1
21 Sp	260/19R	Ventės Ragas	Spring	1.1	Sylvia curruca	H. majoris (CWT4)	-	-	-	-	-	-	-	-	+	na	-	na	-	-	-	-	-	-	-	-	-	+	na	-	na	-	49543 NS- 49547 NS
7 Sp	65/17R	Ventės Ragas	Spring	1.2	Cyanistes caeruleus	H. majoris (PARUS1)	+	+	+	na	+	-	-	na	na	na	na	na	na	+	+	+	-	+	-	-	na	na	na	na	na	na	49548 NS - 49557 NS	1
23 Sp	29/21R	Ventės Ragas	Spring	5.1	Cyanistes caeruleus	H. majoris (PARUS1) L. sp. (PARUS14) c	-	+	+	-	+	-	-	-	+	na	-	na	-	-	+	+	-	+	-	-	-	+	na	-	na	-	49558 NS - 49566 NS, 49582 NS	2
1 Au	230/20R	Ventės Ragas	Autumn	0.1	Cyanistes caeruleus	H. majoris (PARUS1) L. sp. (PARUS4) c	-	-	-	-	na	-	-	-	-	-	-	na	na	-	-	-	-	-	-	-	-	-	na	-	na	na	49567 NS - 49568 NS	2
2 Au	236/20R	Ventės Ragas	Autumn	0.1	Cyanistes caeruleus	H. majoris (PARUS1) L. sp. (PARUS87) c	-	-	-	na	-	-	-	-	-	na	-	na	na	-	-	-	-	+	-	-	-	-	na	-			49569 NS - 49570 NS
3 Au	255/20R	Ventės Ragas	Autumn	0.04	Cyanistes caeruleus	H. majoris (PARUS1)	-	-	-	-	-	-	-	-	-	na	na	na	na	-	-	-	-	-	-	-	-	-	na	na	na	na
4 Au	259/20R	Ventės Ragas	Autumn	0.1	Cyanistes caeruleus	H. majoris (PARUS1)	-	-	-	-	+	-	-	-	-	na	-	na	na	-	-	-	-	-	-	-	-	-	na	-	na	na	49571 NS
5 Au	452/20R	Ventės Ragas	Autumn	0.03	Cyanistes caeruleus	H. majoris (PARUS1) L. sp. (PARUS4) c	na	-	na	-	-	na	-	-	-	na	-	na	na	-	-	-	-	-	-	-	-	-	na	-	na	-
2 Su	4/20L	Labanoras	Summer	0.5	Parus major	H. majoris (PARUS1)	-	+	-	-	+	-	-	+ e	-	na	-	na	na	-	+	-	-	+	-	-	-	-	na	-	na	na	49572 NS - 49578 NS	1
6 Au	511/20R	Ventės Ragas	Autumn	0.07	Parus major	H. majoris (PARUS1)	-	-	na	+	+	-	na	na	-	na	-	na	na	-	-	-	-	+	-	-	-	-	na	-			49579 NS - 49582 NS
7 Au	513/20R	Ventės Ragas	Autumn	0.01	Parus major	H. majoris (PARUS1) L. sp. (PARUS18) c	-	-	-	-	+	-	-	-	-	na	-	na	na	-	-	-	-	-	-	-	-	-	na	-	na	na	49853 NS
26 Sp	1051/21R	Ventės Ragas	Spring	0.1	Parus major	H. majoris (PARUS1) L. sp. (PARUS19) c	-	-	-	-	-	-	-	-	-	na	-	na	na	-	-	-	-	-	-	-	-	-	na	-	na	na
8 Au	944/20R	Ventės Ragas	Autumn	0.03	Parus montanus	H. majoris (PARUS1)	-	-	-	-	+	-	-	-	-	na	-	na	-	-	-	-	-	+	-	-	-	-	na	-	na	-	49584 NS - 49585 NS
9 Sp	38/18L	Labanoras	Spring	NEG	Phylloscopus sibilatrix	H. majoris (PHSIB1)	-	-	-	-	+	-	-	na	na	na	na	na	na	-	-	-	-	+	-	-	na	na	na	na	na	na	49586 NS - 49588 NS
14 Sp	136/18R	Ventės Ragas	Spring	0,7 MIX a	Sylvia atricapilla	Haemoproteus parabelopolskyi (SYAT02) H. majoris (PHSIB1), Leucocytozoon sp. (SYAT39), L. sp. (SYAT40)	-	-	-	-	-	-	-	na	na	na	na	na	na	-	-	-	-	-	-	-	na	na	na	na	na	na
9 Au	H10/22R	Ventės Ragas	Autumn	na	Aegithalos caudatus	H. majoris (PHSIB1)	-	-	-	-	-	-	-	-	-	na	-	-	-	-	-	-	-	-	-	-	-	-	na	-	na	na
11 Sp	63/18R	Ventės Ragas	Spring	1,0 MIX a	Sylvia communis	Haemoproteus. sp. (CWT3) Haemoproteus majoris (WW2)	-	-	-	-	-	-	-	na	na	na	na	na	na	-	-	-	-	-	-	-	na	na	na	na	na	na
16 Sp	195/18R	Ventės Ragas	Spring	0.08	Sylvia communis	H. majoris (WW2)	-	-	-	-	-	-	-	na	na	na	na	na	na	-	-	-	-	-	-	-	na	na	na	na	na	na
12 Sp	98/18R	Ventės Ragas	Spring	6,3 MIX a	Sylvia atricapilla	H. majoris (WW2) H. parabelopolskyi b L. sp. (SYAT22) c Leucocytozoon majoris b	+	+	-	-	-	-	+	na	na	na	na	na	na	+	+	-	-	-	-	+	na	na	na	na	na	na	49589 NS - 49594 NS
24 Sp	278/21R	Ventės Ragas	Spring	4,7 MIX a	Sylvia atricapilla	H. majoris (WW2) H. sp.1 b H. parabelopolskyi b H. sp 2. b L. sp. (COCOE09) c	+	-	-	-	+	-	-	-	+	-	-	-	na	+	-	-	-	+	-	-	-	+	-	-	-	na	49595 NS - 49605 NS	2
15 Sp	146/18R	Ventės Ragas	Spring	0.2	Sylvia nisoria	H. majoris(WW2)	-	-	-	-	-	-	-	na	na	na	na	na	na	-	-	-	-	-	-	-	na	na	na	na	na	na
4 Su	H21/21V	Vilnius	Summer	Lysis of cells; parasite present but not possible to count/see properly	Phoenicurus phoenicurus	H. majoris (WW2)	-	-	-	-	-	-	-	-	-	-	-	-	-	-	-	-	-	-	-	-	-	-	na	-	-	na
29 Sp	207/22R	Ventės Ragas	Spring	0.6	Phylloscopus trochilus	H. majoris (WW2)	-	-	-	-	-	-	-	-	+	-	-	-	-	-	-	-	-	-	-	-	-	+	-	-	-	-	49606 NS - 49607 NS	1
4 Sp	205/16R	Ventės Ragas	Spring	0.6	Parus major	H. majoris (WW2 / CWT4 / PARUS1 / PHSIB1)	-	-	+	-	-	-	-	na	na	na	na	na	na	-	-	+	-	-	-	-	na	na	na	na	na	na	49608 NS - 49610 NS
25 Sp	353/21R 375/21R	Ventės Ragas	Spring	0,4 0,2	Parus major	H. majoris (PARUS1 + PHSIB1)	-	-	-	-	-	-	-	-	-	-	-	-	na	-	-	-	-	-	-	-	-	-	-	-	-	na
1 Su	3/20L	Labanoras	Summer	0.1	Parus major	H. majoris (WW2/PHISB1/CWT4)	-	-	-	-	-	-	-	-	-	na	-	-	na	-	-	-	-	-	+ d	-	-	-	na	-	-	na	49611 NS
17 Sp	10/19L	Labanoras	Spring	0.7	Phylloscopus sibilatrix	H. majoris (WW2 / PHSIB1)	-	-	-	na	+	-	-	+	-	na	na	na	na	-	-	-	na	+	-	-	-	-	na	na	-	na	49612 NS - 49614 NS
20 Sp	206/19R	Ventės Ragas	Spring	1.1	Phoenicurus ochruros	H. majoris (PHSIB1 and WW2 f)	+	-	-	-	-	+	-	+	+	-	na	na	-	+	-	-	-	-	+	-	+	+	-	na	na	-	49615 NS - 49632 NS	1

## Sheet: Sheet2
49493 NS	58/16R	Blood
49494 NS	58/16R	Blood
49495 NS	58/16R	Blood
49496 NS	58/16R	Hist lungs
49497 NS	58/16R	Hist lungs
49498 NS	58/16R	Hist heart
49499 NS	58/16R	Hist heart
49500 NS	58/16R	CISH
49501 NS	58/16R	CISH
49502 NS	152/16R	Hist lungs
49503 NS	152/16R	Hist lungs
49504 NS	152/16R	CISH
49505 NS	99/19R	CISH
49506 NS	79/22R	Hist kidneys
49507 NS	79/22R	Hist kidneys
49508 NS	79/22R	Hist kidneys
49509 NS	79/22R	Hist lungs
49510 NS	79/22R	Hist lungs
49511 NS	79/22R	Hist lungs
49512 NS	79/22R	Hist gizzard
49513 NS	79/22R	Hist gizzard
49514 NS	79/22R	Hist gizzard
49515 NS	79/22R	Hist intestine
49516 NS	79/22R	Hist intestine
49517 NS	79/22R	Hist intestine
49518 NS	79/22R	CISH
49519 NS	79/22R	CISH
49520 NS	79/22R	CISH
49521 NS	93/22R	Hist pancreas
49522 NS	93/22R	Hist pancreas
49523 NS	93/22R	Hist pancreas
49524 NS	93/22R	Hist gizzard
49525 NS	93/22R	Hist gizzard
49526 NS	93/22R	Hist gizzard
49527 NS	93/22R	CISH
49528 NS	93/22R	CISH
49529 NS	9/20L	CISH
49530 NS	267/16R	Hist muscles
49531 NS	417/19R	Blood
49532 NS	417/19R	Hist
49533 NS	417/19R	CISH
49534 NS	20/19R	Hist gizzard
49535 NS	20/19R	Hist gizzard
49536 NS	20/19R	Hist gizzard
49537 NS	20/19R	Hist gizzard
49538 NS	20/19R	Hist intestine
49539 NS	20/19R	CISH
49540 NS	20/19R	CISH
49541 NS	20/19R	CISH
49542 NS	20/19R	CISH
49543 NS	260/19R	Hist gizzard
49544 NS	260/19R	Hist gizzard
49545 NS	260/19R	Hist gizzard
49546 NS	260/19R	CISH
49547 NS	260/19R	CISH
49548 NS	65/17R	Hist kidneys
49549 NS	65/17R	Hist kidneys
49550 NS	65/17R	Hist liver
49551 NS	65/17R	Hist liver
49552 NS	65/17R	Hist liver
49553 NS	65/17R	Hist lungs
49554 NS	65/17R	Hist lungs
49555 NS	65/17R	Hist lungs
49556 NS	65/17R	Hist heart
49557 NS	65/17R	CISH
49558 NS	29/21R	Hist gizzard
49559 NS	29/21R	Hist lungs
49560 NS	29/21R	Hist liver
49561 NS	29/21R	Hist liver
49562 NS	29/21R	Hist kidneys
49563 NS	29/21R	Hist
49564 NS	29/21R	Hist
49565 NS	29/21R	CISH
49566 NS	29/21R	CISH
49582 NS	29/21R	CISH	with H17/20R = 511/20R
49567 NS	230/20R	Blood
49568 NS	230/20R	Blood
49569 NS	236/20R	Hist kidneys
49570 NS	236/20R	Hist kidneys
49571 NS	259/20R	CISH
49572 NS	4/20L	Hist kidneys
49573 NS	4/20L	Hist kidneys
49574 NS	4/20L	Hist kidneys
49575 NS	4/20L	Hist lungs
49576 NS	4/20L	Hist lungs
49577 NS	4/20L	CISH
49578 NS	4/20L	CISH
49579 NS	511/20R	Hist kidneys
49580 NS	511/20R	CISH
49581 NS	511/20R	CISH
49582 NS	511/20R	CISH	with H7/21R = 29/21R
49583 NS	513/20R	CISH
49584 NS	944/20R	Hist kidneys
49585 NS	944/20R	CISH
49586 NS	38/18L	Hist kidneys
49587 NS	38/18L	Hist kidneys
49588 NS	38/18L	CISH
49589 NS	98/18R	Hist
49590 NS	98/18R	Hist
49591 NS	98/18R	Hist
49592 NS	98/18R	CISH
49593 NS	98/18R	CISH
49594 NS	98/18R	CISH
49595 NS	278/21R	Blood
49596 NS	278/21R	Hist gizzard
49597 NS	278/21R	Hist gizzard
49598 NS	278/21R	Hist heart
49599 NS	278/21R	Hist kidneys
49600 NS	278/21R	CISH
49601 NS	278/21R	CISH
49602 NS	278/21R	CISH
49603 NS	278/21R	CISH
49604 NS	278/21R	CISH
49605 NS	278/21R	CISH
49606 NS	207/22R	Hist gizzard
49607 NS	207/22R	CISH
49608 NS	205/16R	Hist liver
49609 NS	205/16R	Hist liver
49610 NS	205/16R	CISH
49611 NS	3/20L	Hist brain
49612 NS	10/19L	Hist kidneys
49613 NS	10/19L	CISH
49614 NS	10/19L	CISH
49615 NS	206/19R	Blood
49616 NS	206/19R	Blood
49617 NS	206/19R	Blood
49618 NS	206/19R	Hist
49619 NS	206/19R	Hist
49620 NS	206/19R	Hist
49621 NS	206/19R	Hist
49622 NS	206/19R	Hist
49623 NS	206/19R	Hist
49624 NS	206/19R	Hist
49625 NS	206/19R	Hist
49626 NS	206/19R	CISH
49627 NS	206/19R	CISH
49628 NS	206/19R	CISH
49629 NS	206/19R	CISH
49630 NS	206/19R	CISH
49631 NS	206/19R	CISH
49632 NS	206/19R	CISH
