# Supplementary material for: Comparative Analysis of the Exo-Erythrocytic Development of Five Lineages of Haemoproteus majoris, a Common Haemosporidian Parasite of European Passeriform Birds
Source: Pathogens. 2023 Jun 30;12(7):898. doi: 10.3390/pathogens12070898 (PMC10386383; doi:10.3390/pathogens12070898)
Supplement: Supplementary file 1 [file pathogens-12-00898-s001.zip › Table S2.xlsx]

## Sheet: Sheet1
Table S2. Data on all individuals with Haemoproteus majoris hPARUS1 infections investigated for exo-erythrocytic stages. Information is separated by method (haematoxylin and eosin (H&E) stained sections, the sections treated with chromogenic in situ hybridization (CISH) probe Haemo18S, or combined results) and by season and host species. Data is provided for the number of sections investigated, n…
																																									Abbreviations:
																																									He	heart		Sp	spleen		Mu	muscle
																																									Lu	lung		Ki	kidney		Int	intestine
																																									Li	liver		Br	brain		Gi	gizzard
																																									na	organ not collected/sections not present for analysis
H&E																																							CISH
Spring																																							Spring
Host	Individuals (n=3)	N° sections screened									N° sections positive									N° of very young megalomeronts									N° of other megalomeronts										Host	Individuals (n=3)	N° sections screened
		He	Lu	Li	Sp	Ki	Br	Mu	Int	Gi	He	Lu	Li	Sp	Ki	Br	Mu	Int	Gi	He	Lu	Li	Sp	Ki	Br	Mu	Int	Gi	He	Lu	Li	Sp	Ki	Br	Mu	Int	Gi				He	Lu	Li	Sp	Ki	Br	Mu	Int	Gi
Cyanistes caeruleus	65/17R, 7 Sp	19	13	14	9	14	12	14	na	na	3	12	11	0	14	0	0	na	na	0	0	0	0	1	0	0	na	na	3	17	13	0	35	0	0	na	na		Cyanistes caeruleus	65/17R, 7 Sp	1	1	1	1	1	1	1	na	na
	29/21R, 23 Sp	6	8	6	11	8	6	5	6	6	0	7	6	0	4	0	0	0	6	0	0	0	0	0	0	0	0	0	0	8	17	0	53	0	0	0	12			29/21R, 23 Sp	1	1	1	1	1	1	1	1	1
Parus major	1051/21R, 26 Sp	4	6	4	4	6	4	6	6	5	0	0	0	0	0	0	0	0	0	0	0	0	0	0	0	0	0	0	0	0	0	0	0	0	0	0	0		Parus major	1051/21R, 26 Sp	1	1	1	1	1	1	1	1	1
Parus montanus																																							Parus montanus
Summer																																							Summer
Host	Individuals (n=1)	N° sections screened									N° sections positive									N° of very young megalomeronts									N° of other megalomeronts										Host	Individuals (n=1)	N° sections screened
		He	Lu	Li	Sp	Ki	Br	Mu	Int	Gi	He	Lu	Li	Sp	Ki	Br	Mu	Int	Gi	He	Lu	Li	Sp	Ki	Br	Mu	Int	Gi	He	Lu	Li	Sp	Ki	Br	Mu	Int	Gi				He	Lu	Li	Sp	Ki	Br	Mu	Int	Gi
Cyanistes caeruleus																																							Cyanistes caeruleus
Parus major	4/20L, 2 Su	8	8	8	8	8	8	8	8	8	0	2	0	0	4	0	0	0	0	0	0	0	0	0	0	0	0	0	0	3	0	0	15	0	0	0	0		Parus major	4/20L, 2 Su	1	1	1	1	1	1	1	1	1
Parus montanus																																							Parus montanus
Autumn																																							Autumn
Host	Individuals (n=8)	N° sections screened									N° sections positive									N° of very young megalomeronts									N° of other megalomeronts										Host	Individuals (n=8)	N° sections screened
		He	Lu	Li	Sp	Ki	Br	Mu	Int	Gi	He	Lu	Li	Sp	Ki	Br	Mu	Int	Gi	He	Lu	Li	Sp	Ki	Br	Mu	Int	Gi	He	Lu	Li	Sp	Ki	Br	Mu	Int	Gi				He	Lu	Li	Sp	Ki	Br	Mu	Int	Gi
Cyanistes caeruleus	230/20R, 1 Au	13	17	14	27	57	11	11	14	14	0	0	0	0	0	0	0	0	0	0	0	0	0	0	0	0	0	0	0	0	0	0	0	0	0	0	0		Cyanistes caeruleus	230/20R, 1 Au	1	1	1	1	na	1	1	1	1
	236/20R, 2 Au	20	17	17	34	14	15	14	16	15	0	0	0	0	6	0	0	0	0	0	0	0	0	0	0	0	0	0	0	0	0	0	6	0	0	0	0			236/20R, 2 Au	1	1	1	na	1	1	1	1	1
	255/20R, 3 Au	14	15	11	19	57	13	11	13	14	0	0	0	0	0	0	0	0	0	0	0	0	0	0	0	0	0	0	0	0	0	0	0	0	0	0	0			255/20R, 3 Au	1	1	1	1	1	1	1	1	1
	259/20R, 4 Au	20	23	16	16	56	8	11	11	18	0	0	0	0	0	0	0	0	0	0	0	0	0	0	0	0	0	0	0	0	0	0	0	0	0	0	0			259/20R, 4 Au	1	1	1	1	1	1	1	1	1
	452/20R, 5 Au	22	18	12	26	64	14	14	11	13	0	0	0	0	0	0	0	0	0	0	0	0	0	0	0	0	0	0	0	0	0	0	0	0	0	0	0			452/20R, 5 Au	na	1	na	1	1	na	1	1	1
Parus major	511/20R, 6 Au	8	10	9	10	4	8	9	8	6	0	0	0	0	2	0	0	0	0	0	0	0	0	0	0	0	0	0	0	0	0	0	2	0	0	0	0		Parus major	511/20R, 6 Au	1	1	1	1	3	1	1	1	1
	513/20R, 7 Au	19	16	16	24	18	11	7	13	11	0	0	0	0	0	0	0	0	0	0	0	0	0	0	0	0	0	0	0	0	0	0	0	0	0	0	0			513/20R, 7 Au	1	1	1	1	1	1	1	1	1
Parus montanus	944/20R, 8 Au	28	25	24	24	24	16	12	19	21	0	0	0	0	9	0	0	0	0	0	0	0	0	7	0	0	0	0	0	0	0	0	2	0	0	0	0		Parus montanus	944/20R, 8 Au	3	3	3	3	3	3	3	3	3
H&E + CISH
Spring
Host	Individuals (n=3)	N° sections screened									N° sections positive									N° of very young megalomeronts									N° of other megalomeronts
		He	Lu	Li	Sp	Ki	Br	Mu	Int	Gi	He	Lu	Li	Sp	Ki	Br	Mu	Int	Gi	He	Lu	Li	Sp	Ki	Br	Mu	Int	Gi	He	Lu	Li	Sp	Ki	Br	Mu	Int	Gi
Cyanistes caeruleus	65/17R, 7 Sp	20	14	15	10	15	13	15	0	0	4	13	12	0	15	0	0	0	0	0	0	0	0	2	0	0	0	0	4	20	15	0	39	0	0	0	0
	29/21R, 23 Sp	7	9	7	12	9	7	6	7	7	0	8	7	0	5	0	0	0	7	0	0	0	0	1	0	0	0	0	0	9	24	0	55	0	0	0	12
Parus major	1051/21R, 26 Sp	5	7	5	5	7	5	7	7	6	0	0	0	0	0	0	0	0	0	0	0	0	0	0	0	0	0	0	0	0	0	0	0	0	0	0	0
Parus montanus
	Total	32	30	27	27	31	25	28	14	13	4	21	19	0	20	0	0	0	7	0	0	0	0	3	0	0	0	0	4	29	39	0	94	0	0	0	12
Summer
Host	Individuals (n=1)	N° sections screened									N° sections positive									N° of very young megalomeronts									N° of other megalomeronts
		He	Lu	Li	Sp	Ki	Br	Mu	Int	Gi	He	Lu	Li	Sp	Ki	Br	Mu	Int	Gi	He	Lu	Li	Sp	Ki	Br	Mu	Int	Gi	He	Lu	Li	Sp	Ki	Br	Mu	Int	Gi
Cyanistes caeruleus
Parus major	4/20L, 2 Su	9	9	9	9	9	9	9	9	9	0	3	0	0	5	0	0	1	0	0	0	0	0	0	0	0	0	0	0	4	0	0	16	0	0	1	0
Parus montanus
	Total	9	9	9	9	9	9	9	9	9	0	3	0	0	5	0	0	1	0	0	0	0	0	0	0	0	0	0	0	4	0	0	16	0	0	1	0
Autumn
Host	Individuals (n=8)	N° sections screened									N° sections positive									N° of very young megalomeronts									N° of other megalomeronts
		He	Lu	Li	Sp	Ki	Br	Mu	Int	Gi	He	Lu	Li	Sp	Ki	Br	Mu	Int	Gi	He	Lu	Li	Sp	Ki	Br	Mu	Int	Gi	He	Lu	Li	Sp	Ki	Br	Mu	Int	Gi
Cyanistes caeruleus	230/20R, 1 Au	14	18	15	28	57	12	12	15	15	0	0	0	0	0	0	0	0	0	0	0	0	0	0	0	0	0	0	0	0	0	0	0	0	0	0	0
	236/20R, 2 Au	21	18	18	34	15	16	15	17	16	0	0	0	0	6	0	0	0	0	0	0	0	0	0	0	0	0	0	0	0	0	0	6	0	0	0	0
	255/20R, 3 Au	15	16	12	20	58	14	12	14	15	0	0	0	0	0	0	0	0	0	0	0	0	0	0	0	0	0	0	0	0	0	0	0	0	0	0	0
	259/20R, 4 Au	21	24	17	17	57	9	12	12	19	0	0	0	0	1	0	0	0	0	0	0	0	0	2	0	0	0	0	0	0	0	0	0	0	0	0	0
	452/20R, 5 Au	22	19	12	27	65	14	15	12	14	0	0	0	0	0	0	0	0	0	0	0	0	0	0	0	0	0	0	0	0	0	0	0	0	0	0	0
Parus major	511/20R, 6 Au	9	11	10	11	7	9	10	9	7	0	0	0	1	5	0	0	0	0	0	0	0	1	11	0	0	0	0	0	0	0	0	3	0	0	0	0
	513/20R, 7 Au	20	17	17	25	19	12	8	14	12	0	0	0	0	1	0	0	0	0	0	0	0	0	2	0	0	0	0	0	0	0	0	0	0	0	0	0
Parus montanus	944/20R, 8 Au	31	28	27	27	27	19	15	22	24	0	0	0	0	10	0	0	0	0	0	0	0	0	11	0	0	0	0	0	0	0	0	2	0	0	0	0
	Total	153	151	128	189	305	105	99	115	122	0	0	0	1	23	0	0	0	0	0	0	0	1	26	0	0	0	0	0	0	0	0	11	0	0	0	0
[truncated: 27 more columns]

## Sheet: Sheet2
				Abbreviations:
				He	heart		Sp	spleen		Mu	muscle
				Lu	lung		Ki	kidney		Int	intestine
				Li	liver		Br	brain		Gi	gizzard
